# Supplementary material
Source: PubMed Central journal article supplement (PMC4788295)
Supplement: lazm887224.ww1_default.pdf [file lazm887224.ww1_default.pdf]

Supplementary Table 1. Hazard Ratios for All-Cause and Cause-Specific Mortality comparing people with Nonalcoholic fatty liver disease (using alternative definition) ‡ and Nonalcoholic steatohepatitis to people No Hepatic Steatosis. The Third National Health and Nutrition Examination Survey (1988-1994)

|                                     | No Hepatic Steatosis | Nonalcoholic fatty liver disease ‡ | Nonalcoholic steatohepatitis |
|-------------------------------------|----------------------|------------------------------------|------------------------------|
|                                     | 8859                 | 1984                               | 426                          |
| All-Cause Mortality, no. events     | 1310                 | 439                                | 57                           |
| Model 1                             | 1 [Reference]        | 1.01 (0.87 to 1.19)                | 0.95 (0.62 to 1.47)          |
| Model 2                             | 1 [Reference]        | 0.91 (0.78 to 1.08)                | 0.80 (0.53 to 1.22)          |
| CVD Mortality, no. events           | 508                  | 182                                | 16                           |
| Model 1                             | 1 [Reference]        | 1.07 (0.84 to 1.36)                | 0.88 (0.43 to 1.80)          |
| Model 2                             | 1 [Reference]        | 0.86 (0.67 to 1.11)                | 0.59 (0.29 to 1.20)          |
| Cancer- Mortality, no. events       | 350                  | 107                                | 14                           |
| Model 1                             | 1 [Reference]        | 0.87 (0.64 to 1.17)                | 0.48 (0.25 to 0.95)          |
| Model 2                             | 1 [Reference]        | 0.89 (0.64 to 1.22)                | 0.53 (0.26 to 1.10)          |
| Liver Disease mortality, no. events | 34                   | 6                                  | 3                            |
| Model 1                             | 1 [Reference]        | 0.95 (0.21 to 4.40)                | 1.60 (0.25 to 10.15)         |
| Model 2                             | 1 [Reference]        | 0.70 (0.13 to 3.78)                | 1.18 (0.16 to 8.56)          |

‡ Nonalcoholic fatty liver disease defined as presence of moderate or severe hepatic steatosis in the absence of elevated alcohol consumption and use of antiretroviral drugs, or hepatitis C, or iron overload.

Model 1: Adjusted for sex, race

Model 2: Further adjusted for education, smoking, alcohol consumption, physical activity, body mass index, hypertension, hypercholesterolemia, and diabetes

Supplementary Table 2. Hazard Ratios for All-Cause and Cause-Specific Mortality comparing people with Nonalcoholic fatty liver disease and Nonalcoholic steatohepatitis to people No Hepatic Steatosis ††. The Third National Health and Nutrition Examination Survey (1988-1994)

|                                     | No Hepatic Steatosis | Nonalcoholic fatty liver disease † | Nonalcoholic steatohepatitis |
|-------------------------------------|----------------------|------------------------------------|------------------------------|
|                                     | 9942                 | 2088                               | 427                          |
| All-Cause Mortality, no. events     | 1503                 | 469                                | 57                           |
| Model 1                             | 1 [Reference]        | 1.0 (0.87 to 1.16)                 | 0.91 (0.59 to 1.39)          |
| Model 2                             | 1 [Reference]        | 0.90 (0.77 to 1.06)                | 0.78 (0.50 to 1.17)          |
| CVD Mortality, no. events           | 571                  | 192                                | 16                           |
| Model 1                             | 1 [Reference]        | 1.06 (0.83 to 1.35)                | 0.85 (0.41 to 1.75)          |
| Model 2                             | 1 [Reference]        | 0.86 (0.67 to 1.11)                | 0.59 (0.29 to 1.20)          |
| Cancer- Mortality, no. events       | 407                  | 116                                | 14                           |
| Model 1                             | 1 [Reference]        | 0.85 (0.64 to 1.14)                | 0.46 (0.23 to 0.89)          |
| Model 2                             | 1 [Reference]        | 0.87 (0.64 to 1.18)                | 0.47 (0.23 to 0.96)          |
| Liver Disease mortality, no. events | 47                   | 7                                  | 3                            |
| Model 1                             | 1 [Reference]        | 0.56 (0.13 to 2.52)                | 1.12 (0.19 to 6.76)          |
| Model 2                             | 1 [Reference]        | 0.49 (0.09 to 2.59)                | 0.95 (0.13 to 6.71)          |

†† (n=12,516), including people with elevated alcohol consumption and using antiretrovirals in the reference group.

Model 1: Adjusted for sex, race

Model 2: Further adjusted for education, smoking, alcohol consumption, physical activity, body mass index, hypertension, hypercholesterolemia, and diabetes

Supplementary Table 3. Hazard Ratios for All-Cause and Cause-Specific Mortality comparing people with Nonalcoholic fatty liver disease with severe steatosis and Nonalcoholic steatohepatitis with severe steatosis to people No Hepatic Steatosis . The Third National Health and Nutrition Examination Survey (1988-1994)

|                                  | No Hepatic Steatosis | Nonalcoholic fatty liver disease with severe hepatic steatosis | NASH with severe hepatic steatosis and elevated liver enzymes |
|----------------------------------|----------------------|----------------------------------------------------------------|---------------------------------------------------------------|
| All-Cause Mortality              |                      |                                                                |                                                               |
| Model 1                          | 1 [Reference]        | 1.09 (0.84 to 1.42)                                            | 0.84 (0.50 to 1.40)                                           |
| Model 3                          | 1 [Reference]        | 0.95 (0.73 to 1.25)                                            | 0.75 (0.45 to 1.24)                                           |
| Cardiovascular disease mortality |                      |                                                                |                                                               |
| Model 1                          | 1 [Reference]        | 0.93 (0.58 to 1.48)                                            | 0.79 (0.28 to 2.26)                                           |
| Model 3                          | 1 [Reference]        | 0.70 (0.44 to 1.10)                                            | 0.52 (0.20 to 1.34)                                           |
| Cancer mortality                 |                      |                                                                |                                                               |
| Model 1                          | 1 [Reference]        | 1.10 (0.68 to 1.78)                                            | 0.94 (0.42 to 2.07)                                           |
| Model 3                          | 1 [Reference]        | 1.14 (0.68 to 1.93)                                            | 1.11 (0.48 to 2.56)                                           |

Model 1: Adjusted for sex, race

Model 2: Further adjusted for education, smoking, alcohol consumption, physical activity, body mass index, hypertension, hypercholesterolemia, and diabetes

Supplementary Table 4. Sensitivity analysis changing the alcohol levels to align to the United Kingdom safe limits. Hazard Ratios for All-Cause and Cause-Specific Mortality comparing people with Nonalcoholic fatty liver disease and Nonalcoholic steatohepatitis with severe steatosis to people No Hepatic Steatosis . The Third National Health and Nutrition Examination Survey (1988-1994)

|                                  | No Hepatic Steatosis | Nonalcoholic fatty liver disease | NASH with severe hepatic steatosis and |
|----------------------------------|----------------------|----------------------------------|----------------------------------------|
| All-Cause Mortality              |                      |                                  |                                        |
| Model 1                          | 1 [Reference]        | 1.04 (0.90 to 1.21)              | 0.98 (0.64 to 1.49)                    |
| Model 3                          | 1 [Reference]        | 0.92 (0.78 to 1.09)              | 0.80 (0.52 to 1.22)                    |
| Cardiovascular disease mortality |                      |                                  |                                        |
| Model 1                          | 1 [Reference]        | 1.11 (0.88 to 1.42)              | 1.06 (0.51 to 2.18)                    |
| Model 3                          | 1 [Reference]        | 0.86 (0.67 to 1.11)              | 0.59 (0.29 to 1.20)                    |
| Cancer mortality                 |                      |                                  |                                        |
| Model 1                          | 1 [Reference]        | 0.88 (0.66 to 1.18)              | 0.42 (0.21 to 0.82)                    |
| Model 3                          | 1 [Reference]        | 0.92 (0.67 to 1.27)              | 0.53 (0.26 to 1.10)                    |

Model 1: Adjusted for sex, race

Model 2: Further adjusted for education, smoking, alcohol consumption, physical activity, body mass index, hypertension, hypercholesterolemia, and diabetes
